# Supplementary material for: In vivo regeneration of interspecies chimeric kidneys using a nephron progenitor cell replacement system
Source: PubMed Central journal article supplement (PMC6502858; doi:10.1038/s41598-019-43482-2), 2019-05-06
Supplement: 41598_2019_43482_MOESM1_ESM.pdf [file 41598_2019_43482_MOESM1_ESM.pdf]

## Supplementary Information

### ***In vivo* regeneration of interspecies chimeric kidneys using a nephron progenitor cell replacement system**

#### **Authors**

Toshinari Fujimoto<sup>1,2</sup>, Shuichiro Yamanaka<sup>1</sup>, Susumu Tajiri<sup>1</sup>, Tsuyoshi Takamura<sup>1,2</sup>, Yatsumu Saito<sup>1</sup>, Kei Matsumoto<sup>1</sup>, Kentaro Takase<sup>1,3</sup>, Fukunaga Shohei<sup>3</sup>, Hiroataka James Okano<sup>2</sup>, Takashi Yokoo<sup>1\*</sup>

<sup>1</sup>Division of Nephrology and Hypertension, Department of Internal Medicine, The Jikei University School of Medicine, 3-25-8, Nishi-Shimbashi, Minato-ku, Tokyo, 105-8461, Japan

<sup>2</sup>Division of Regenerative Medicine, The Jikei University School of Medicine, 3-25-8, Nishi-Shimbashi, Minato-ku, Tokyo, 105-8461, Japan

<sup>3</sup>Division of Cardiology and Nephrology, Department of Internal Medicine, Shimane University Faculty of Medicine, Izumo, Shimane 693-8501, Japan

#### **\*Correspondence**

Prof. Takashi Yokoo, MD, PhD

Division of Nephrology and Hypertension, Department of Internal Medicine, The Jikei University School of Medicine, 3-25-8, Nishi-Shimbashi, Minato-ku, Tokyo, 105-8461, Japan

Tel: +81-3-3433-1111; Fax: +81-3-3433-4297; E-mail: [tyokoo@jikei.ac.jp](mailto:tyokoo@jikei.ac.jp)

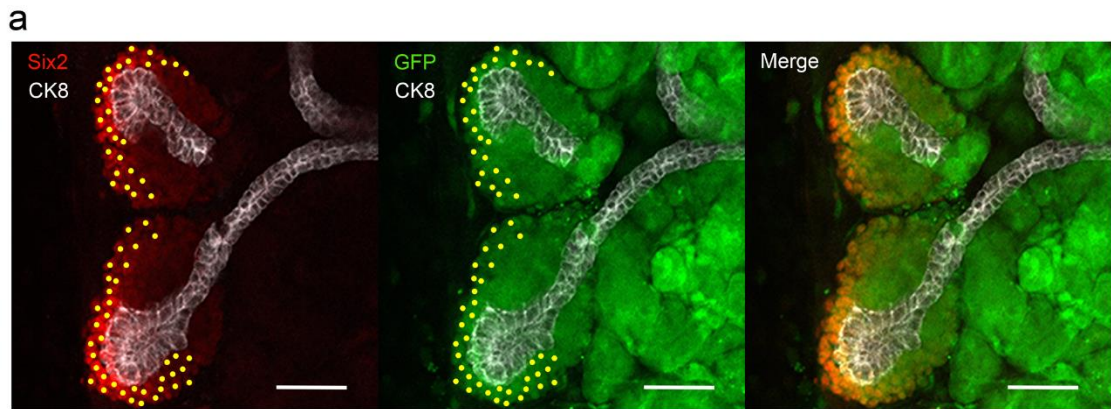

**b**

| Measurement of the replacement rate in the cap mesenchyme |                        |                                               |
|-----------------------------------------------------------|------------------------|-----------------------------------------------|
| Six2-positive NPCs                                        | GFP-NPCs (Donor cells) | Percentage of GFP cells in the cap mesenchyme |
| 29.8 ± 2.5                                                | 29.8 ± 2.5             | 100 ± 0 (%)                                   |

**Supplementary Figure S1. The ratio of donor nephron progenitor cells (NPCs) in the Six2-positive domain after NPC replacement *in vitro***

**(a)** Representative images of the cap mesenchyme after eliminating host NPCs and replacing with donor rat GFP-NPCs. We manually counted the ratio of donor NPCs in the Six2-positive domain. Left column, yellow spots indicate Six2-positive NPCs; middle column, these spots entirely merged with donor GFP-NPCs; right column, the merged image (scale bars, 50  $\mu\text{m}$ ). **(b)** We assessed the number of donor GFP-NPCs and the replacement rate in the cap mesenchyme. The number of GFP-NPCs was  $29.8 \pm 2.5$  (mean  $\pm$  standard errors of the mean;  $n = 6$ ); 100% replacement of host NPCs with donor NPCs was possible.

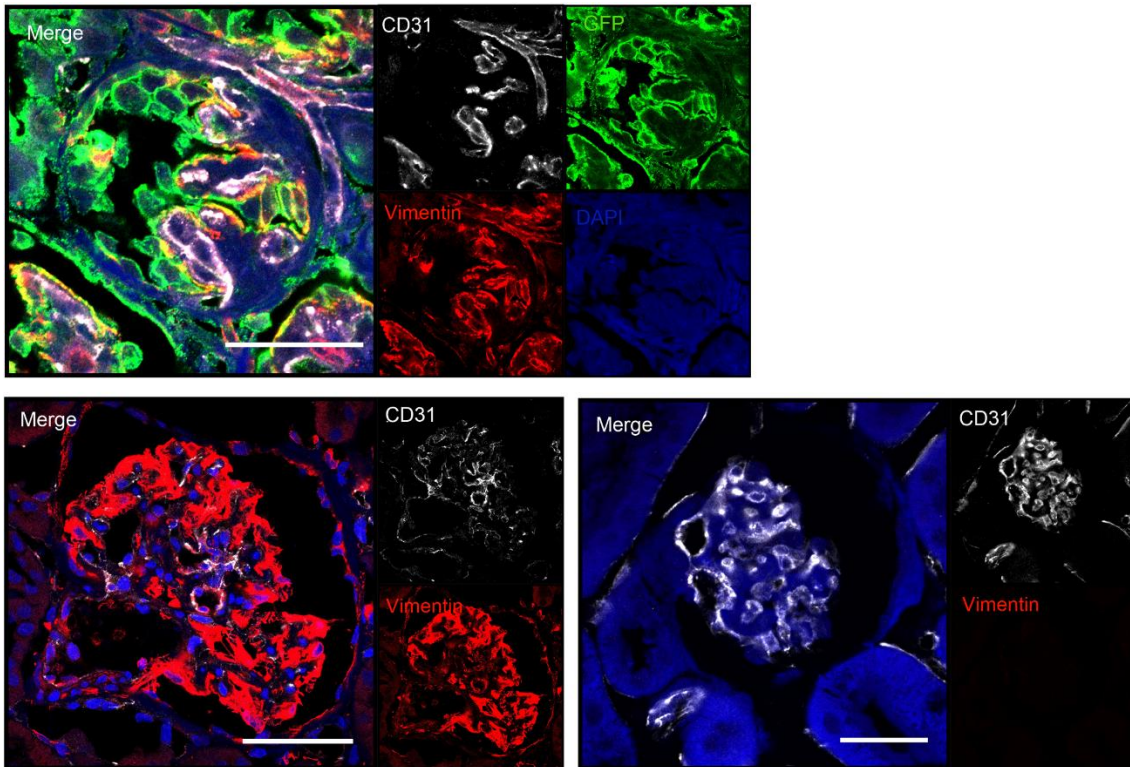

**Supplementary Figure S2. Neo-glomeruli were vascularised with blood vessels originating from the host rat**

We stained the sections of the regenerated kidney, native rat kidney and native mouse kidney with anti-CD31 and anti-vimentin antibodies. Endothelial cells in neo-glomeruli were expressed as the endothelial marker CD31 and the rat-specific marker vimentin V9 (upper column; scale bars, 100  $\mu\text{m}$ ). In addition, endothelial cells in rat glomeruli were expressed as the endothelial marker CD31 and the rat-specific marker vimentin V9 (left lower column; scale bars, 50  $\mu\text{m}$ ). Endothelial cells in mouse glomeruli were expressed as the endothelial marker CD31 but not as the rat-specific marker vimentin V9 (right lower column; scale bars, 50  $\mu\text{m}$ ).
